# Supplementary material for: Orphelia: predicting genes in metagenomic sequencing reads
Source: PubMed Central journal article supplement — Nucleic Acids Res. 2009 May 8;37(Web Server issue):W101–5. doi: 10.1093/nar/gkp327 (PMC2703946; doi:10.1093/nar/gkp327), 2009-05-08
Supplement: gkp327_1.pdf [file gkp327_1.pdf]

# Supplementary Materials to "Orphelia: predicting genes in metagenomic sequencing reads"

Katharina J. Hoff<sup>1\*</sup>; Thomas Lingner<sup>1,2</sup>, Peter Meinicke<sup>1</sup> and Maike Tech<sup>1</sup>

April 8, 2009

<sup>1</sup>Abteilung Bioinformatik, Institut für Mikrobiologie und Genetik, Georg-August-Universität Göttingen, Goldschmidtstr. 1, 37077 Göttingen, Germany, E-Mails: {katharina, peter, maike}@gobics.de <sup>2</sup>Center for Genomic Regulation, Comparative Bioinformatics Research Group, Biomedical Research Park de Barcelona, c/Dr. Aiguader 88, 08003 Barcelona, Spain, E-Mail: thomas.lingner@crg.es

## Methods

### Parameters of sequencing read simulation with MetaSim

The sequence database used by MetaSim was downloaded from <ftp://ftp.ncbi.nlm.nih.gov/genomes/Bacteria/all.fna.tar.gz> on 02/12/09. For all simulations, the following taxon-profile was used:

```
1  taxid    243232 # Methanocaldococcus_jannaschii_DSM_2661
1  taxid    107806 # Buchnera aphidicola str. APS (Acyrthosiphon pisum)
1  taxid    224325 # Archaeoglobus fulgidus DSM 4304
1  taxid    348780 # Natronomonas pharaonis DSM 2160
1  taxid    74546 # Prochlorococcus marinus str. MIT 9312
1  taxid    292805 # Wolbachia endosymbiont strain TRS of Brugia malayi
1  taxid    85963 # Helicobacter pylori J99
1  taxid    224308 # Bacillus subtilis subsp. subtilis str. 168
```

---

\*to whom correspondence should be addressed

```
1 taxid 511145 # Escherichia coli str. K-12 substr. MG1655
1 taxid 194439 # Chlorobium tepidum TLS
1 taxid 306537 # Corynebacterium jeikeium K411
1 taxid 272560 # Burkholderia pseudomallei K96243 chromosome 1
1 taxid 272560 # Burkholderia pseudomallei K96243 chromosome 2
```

### **Sanger reads**

Sanger reads were sampled with the following general simulation parameters:

Number Of Reads / Mate Pairs=45142

Error Model=Sanger

Sanger Error Model Read Length Parameters=

Distribution: Normal

Mean: 700.0

2nd parameter: 100.0

Sanger Error Model Configuration=

Mate Pair Probability: 1.0

Proportion of Deletion Errors: 0.2

Proportion of Insertion Errors: 0.2

Proportion of Substitution Errors: 0.6000000000000001

Sanger Error Model DNA Clone Parameters=

Distribution: Normal

Mean: 5000.0

2nd parameter: 500.0

```

Combine All Files=false
Uniform Sequence Weights=false
Number Of Threads=1
Write FastA=true
Compress Output Files=false

```

For five different simulation scenarios, different error rates at the beginning (beg.) and end of read were used:

| Scenario No. | error rate beg. | error rate end |
|--------------|-----------------|----------------|
| I            | 0               | 0              |
| II           | 0.01            | 0.02           |
| III          | 0.001           | 0.002          |
| IV           | 0.0001          | 0.0002         |
| V            | 0.00001         | 0.00002        |

## Supplementary Figures

**Supplementary Figure 1: Sensitivity of Orphelia with Net300 and Net700 on fragments ranging from 200 to 500 bp length (sampled to a 1-fold genome coverage).**

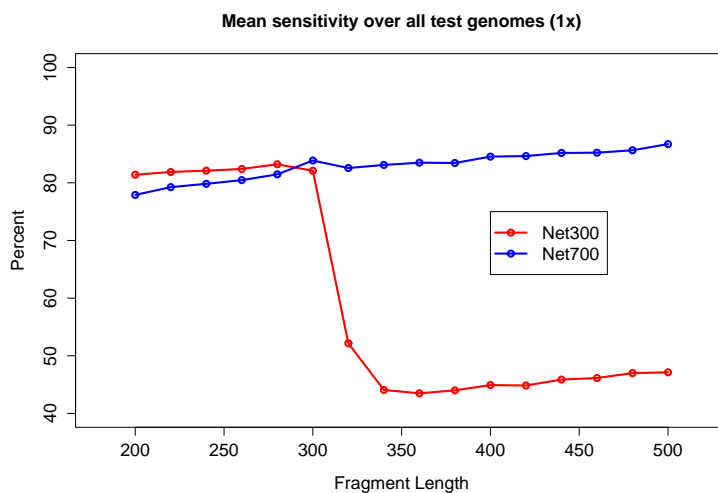

**Supplementary Figure 2: Specificity of Orphelia with Net300 and Net700 on fragments ranging from 200 to 500 bp length (sampled to a 1-fold genome coverage).**

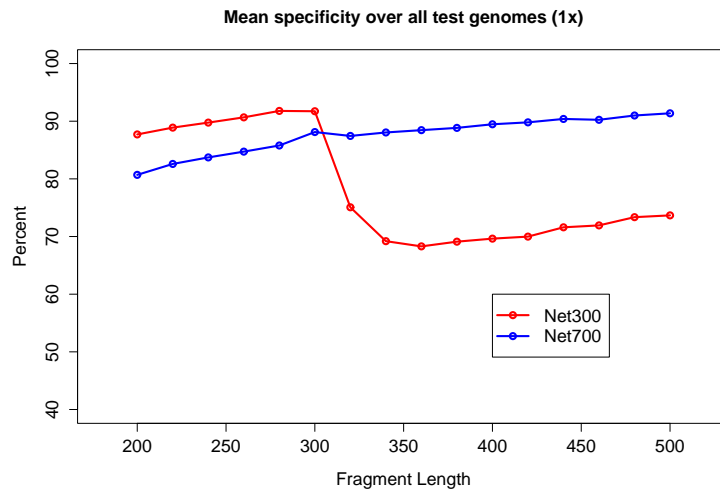

## Supplementary Tables

**Supplementary Table 1: Gene prediction performance (on amino acid level) of Orphelia Net700 on simulated Sanger reads with different error rates.**

| Error rate beginning of read | Error rate end of read | Sensitivity | Specificity |
|------------------------------|------------------------|-------------|-------------|
| 0                            | 0                      | 95.3        | 96.3        |
| $1 \times 10^{-5}$           | $2 \times 10^{-5}$     | 95.3        | 96.3        |
| $1 \times 10^{-4}$           | $2 \times 10^{-4}$     | 94.5        | 95.9        |
| $1 \times 10^{-3}$           | $2 \times 10^{-3}$     | 87.6        | 93.3        |
| $1 \times 10^{-2}$           | $2 \times 10^{-2}$     | 47.2        | 75.3        |
